# Supplementary material for: Heavy Metal Pollution and Its Prior Pollution Source Identification in Agricultural Soil: A Case Study in the Qianguo Irrigation District, Northeast China
Source: MDPI journal article supplement (doi:10.3390/su14084494), 2022-04-10
Supplement: s1 [file s1]

Archive with 1 entries (1 files):
- sustainability-1646248-supplementary.pdf
