# Supplementary material for: Heavy Metal Pollution and Its Prior Pollution Source Identification in Agricultural Soil: A Case Study in the Qianguo Irrigation District, Northeast China
Source: MDPI journal article supplement (doi:10.3390/su14084494), 2022-04-10
Supplement: s1 [file s1 › sustainability-1646248-supplementary.pdf]

## 1. Assessment methods of soil heavy metal

The calculation formula of Contamination factor (CF) is as follows [1]:

$$CF = \frac{C_m(\text{sample})}{C_m(\text{background})} \quad (1)$$

where  $C_m$  is the measured values of individual heavy metals; Class 1,  $CF < 1$  indicates low contamination; Class 2,  $1 \leq CF < 3$  indicates moderate contamination; Class 3,  $3 \leq CF < 6$  indicates considerable contamination; Class 4,  $CF > 6$  indicates very high contamination.

The calculation formula of Pollution load index (PLI) is as follows [1]:

$$PLI_n = \sqrt[i]{CF_1 \times CF_2 \times CF_3 \times \dots \times CF_i} \quad (2)$$

$$PLI_{\text{zone}} = \sqrt[n]{PLI_1 \times PLI_2 \times PLI_3 \times \dots \times PLI_n} \quad (3)$$

where  $PLI_n$  is the pollution load index at the  $n$ th sampling site,  $PLI_{\text{zone}}$  is the pollution load index across the study area.  $PLI > 1$  suggests that pollution exists; otherwise, there is no pollution.

The calculation formula of Nemerow pollution index ( $P_N$ ) is as follows [2]:

$$P_N = \sqrt{\frac{CF_{\max}^2 + CF_{\text{mean}}^2}{2}} \quad (4)$$

where  $CF_{\max}$  and  $CF_{\text{mean}}$  are the maximum and mean values, respectively. The pollution level of soil can be classified as: safe ( $P_N \leq 0.7$ ), precaution ( $0.7 < P_N \leq 1.0$ ), slightly polluted ( $1.0 < P_N \leq 2.0$ ), moderately polluted ( $2.0 < P_N \leq 3.0$ ), and seriously polluted ( $P_N > 3.0$ ).

The calculation formula of geo-accumulation index ( $I_{\text{geo}}$ ) is as follows [1]:

$$I_{\text{geo}} = \log_2 \left( \frac{C_i}{1.5C_b} \right) \quad (5)$$

where  $C_i$  and  $C_b$  are the measured and background values of individual heavy metals, respectively. and 1.5 is the natural enrichment coefficient of heavy metals in the soil (Loska, Wiechula and Korus 2004). The grading criteria of the  $I_{\text{geo}}$  was shown in Table S2.

The calculation formula of enrichment factor (EF) is as follows [3]:

$$EF = \frac{(C_i/C_{\text{ref}})_{\text{sample}}}{(C_i/C_{\text{ref}})_{\text{background}}} \quad (6)$$

where  $(C_i/C_{\text{ref}})_{\text{sample}}$  represents the heavy metal to reference element concentration ratio for soil sample, and  $(C_i/C_{\text{ref}})_{\text{background}}$  represents the heavy metal to reference element concentration ratio for background value. Mn is selected as the reference metal. The grading criteria of the EF was shown in Table S2.

The improved Nemerow index (INI) method was applied to determine the integrated pollution level of soil heavy metals [2–4]. Its equation is as follows:

$$INI = \sqrt{\frac{I_{\text{geo}_{\max}}^2 + I_{\text{geo}_{\text{avg}}}^2}{2}} \quad (7)$$

where  $I_{geo\_max}$  and  $I_{geo\_avg}$  are the maximum and average values of the  $I_{geo}$  for sample points, respectively. The grade classification criteria was shown in Table S2.

The risk assessment code (RAC) expressed the ecological risk of soil heavy metals through the proportion of their available fraction to the total content. Its arithmetic equation is as follows [5]:

$$RAC = \frac{C_{ava}}{C_i} \quad (8)$$

where RAC is the risk code value,  $C_{ava}$  is the available state of soil heavy metals, and  $C_i$  is the content of heavy metal in soil, the corresponding class classification was shown in Table S3.

The potential ecological risk (RI) takes into account not only the concentration of heavy metal, but also the toxicity of heavy metals and other factors, and can obtain a more comprehensive risk evaluation result [5]. Its arithmetic equation is as follows:

$$E_r^i = T_r^i \times \frac{C_i}{C_b} \quad (9)$$

$$RI = \sum_{i=1}^n E_r^i \quad (10)$$

where  $E_r^i$  is the ecological risk value of individual heavy metals,  $T_r^i$  is the biotoxicity factor value of individual heavy metals, the values of  $T_r^i$  for V, Cr, Co, Cu, Zn, Cd, Pb, Hg and As are 2, 2, 5, 5, 1, 30, 5, 40 and 10, respectively [6].  $C_i$  and  $C_b$  are the concentration and background values of a single heavy metal, respectively. RI is the potential ecological risk index. The evaluation criteria were shown in Table S3.

The human health risk assessment (HHRA) was presented as follows [3] :

$$ADD_{ingest} = \frac{C \times R_{ingest} \times EF \times ED}{BW \times AT} \times 10^{-6} \quad (11)$$

$$ADD_{dermal} = \frac{C \times SA \times SL \times ABF \times EF \times ED}{BW \times AT} \times 10^{-6} \quad (12)$$

$$ADD_{inhal} = \frac{C \times R_{inhal} \times EF \times ED}{PEF \times BW \times AT} \quad (13)$$

$$HI = \sum HQ = \sum \frac{ADD_{ij}}{RfD_{ij}} \quad (14)$$

$$TCR = \sum CR = \sum ADD_{ij} \times SF_{ij} \quad (15)$$

Where  $ADD_{ingest}$ ,  $ADD_{dermal}$ , and  $ADD_{inhal}$  are the average daily dose of soil by ingestion, dermal and inhalation absorption, respectively [7, 8].  $C$  is the concentration of heavy metals in soil, HI and TCR are hazard index and total carcinogenic risk, respectively. HQ and CR are hazard quotient and carcinogenic risk, respectively. The values and meanings of other parameters were shown in Table S4 and S5, and the hierarchy was displayed in Table S6 [7, 8].

## 2. Positive matrix factorization

Positive matrix factorization (PMF) is a source apportionment method recommended by the U.S. Environmental Protection Agency (U.S. EPA) and was first proposed by Paatero and Tapper [9, 10]. PMF model divides the sample data matrix into two matrices

based on chemical mass balance principle: factor contribution (G) and factor profile (F), as shown in Equation:

$$x_{ij} = \sum_{k=1}^p g_{ik} f_{kj} + e_{ij} \quad (16)$$

where  $x_{ij}$  is the concentration matrix of element  $j$  in sample  $i$ ;  $g_{ik}$  is the contribution of factor  $k$  in sample  $i$ ;  $f_{kj}$  is the matrix of chemical compositions of factor;  $e_{ij}$  is the matrix of residual.

Factor contributions and profiles are derived by the PMF model minimizing the objective function  $Q$  defined as follows:

$$Q = \sum_{i=1}^n \sum_{j=1}^m \left( \frac{e_{ij}}{u_{ij}} \right)^2 \quad (17)$$

where  $Q$  is the sum of the squares of the ratios of the residuals and uncertainties ( $u_{ij}$ ). The uncertainty data given by the authors or calculated from the formula.

## Reference

- [1] Guan, J.; Wang, J.; Pan, H.; Yang, C.; Qu, J.; Lu, N.; Yuan, X. Heavy metals in Yinma River sediment in a major Phaeozems zone, Northeast China: Distribution, chemical fraction, contamination assessment and source apportionment. *Sci Rep* **2018**, *8*(1), 1–11. <https://doi.org/10.1038/s41598-018-30197-z>.
- [2] Liu, H.; Zhang, Y.; Yang, J.; Wang, H.; Li, Y.; Shi, Y.; Hu, W. Quantitative source apportionment, risk assessment and distribution of heavy metals in agricultural soils from southern Shandong Peninsula of China. *Sci Total Environ* **2021**, *767*, 144879. <https://doi.org/10.1016/j.scitotenv.2020.144879>.
- [3] Huang, J.; Wu, Y.; Sun, J.; Li, X.; Geng, X.; Zhao, M.; Fan, Z. Health risk assessment of heavy metal (loid)s in park soils of the largest megacity in China by using Monte Carlo simulation coupled with Positive matrix factorization model. *J Hazard Mater* **2021**, *415*, 125629. <https://doi.org/10.1016/j.jhazmat.2021.125629>.
- [4] Santos-Francés, F.; Martínez-Graña, A.; Alonso, R. P.; García Sánchez, A. Geochemical background and baseline values determination and spatial distribution of heavy metal pollution in soils of the Andes mountain range (Cajamarca-Huancavelica, Peru). *Int J Environ Res Public Health* **2017**, *14*(8), 859. <https://doi.org/10.3390/ijerph14080859>.
- [5] Zhang, G.; Bai, J.; Xiao, R.; Zhao, Q.; Jia, J.; Cui, B.; Liu, X. Heavy metal fractions and ecological risk assessment in sediments from urban, rural and reclamation-affected rivers of the Pearl River Estuary, China. *Chemosphere* **2017**, *184*, 278–288. <https://doi.org/10.1016/j.chemosphere.2017.05.155>.
- [6] Liu, J.; Liu, Y.; Liu, Y.; Liu, Z.; Zhang, A. Quantitative contributions of the major sources of heavy metals in soils to ecosystem and human health risks: A case study of Yulin, China. *Ecotoxicol Environ Saf* **2018**, *164*, 261–269. <https://doi.org/10.1016/j.ecoenv.2018.08.030>.

- 
- [7] Xiao, R.; Guo, D.; Ali, A.; Mi, S.; Liu, T.; Ren, C.; Zhang, Z. Accumulation, ecological-health risks assessment, and source apportionment of heavy metals in paddy soils: A case study in Hanzhong, Shaanxi, China. *Environ Pollut* 2019, 248, 349–357. <https://doi.org/10.1016/j.envpol.2019.02.045>.
- [8] Huang, Y.N.; Dang, F.; Li, M.; Zhou, D.M.; Song, Y.; Wang, J.B. Environmental and human health risks from metal exposures nearby a Pb-Zn-Ag mine, China. *Sci Total Environ* 2020, 698, 134326. <https://doi.org/10.1016/j.scitotenv.2019.134326>.
- [9] Wang, Y.; Guo, G.; Zhang, D.; Lei, M. An integrated method for source apportionment of heavy metal (loid) s in agricultural soils and model uncertainty analysis. *Environ Pollut* 2021, 276, 116666. <https://doi.org/10.1016/j.envpol.2021.116666>.
- [10] Guan, Q.; Wang, F.; Xu, C.; Pan, N.; Lin, J.; Zhao, R.; Luo, H. Source apportionment of heavy metals in agricultural soil based on PMF: A case study in Hexi Corridor, northwest China. *Chemosphere* 2018, 193, 189–197. <https://doi.org/10.1016/j.chemosphere.2017.10.151>.

**Table S1.** The information on the reclamation years of sample sites.

| Sample number | Reclamation years | Longitude (°E) | Latitude (°N) |
|---------------|-------------------|----------------|---------------|
| 1             | 60                | 124°59'24"     | 45°0'57"      |
| 2             | 60                | 124°59'24"     | 45°0'57"      |
| 3             | 60                | 124°57'15"     | 45°0'29"      |
| 4             | 60                | 124°52'9"      | 45°0'57"      |
| 5             | 60                | 124°52'9"      | 45°0'57"      |
| 6             | 50                | 124°47'31"     | 45°0'21"      |
| 7             | 50                | 124°47'31"     | 45°0'21"      |
| 8             | 50                | 124°43'25"     | 44°59'4"      |
| 9             | 50                | 124°43'25"     | 44°59'4"      |
| 10            | 30                | 124°39'50"     | 44°58'30"     |
| 11            | 30                | 124°39'50"     | 44°58'30"     |
| 12            | 30                | 124°39'50"     | 44°58'30"     |
| 13            | 30                | 124°39'50"     | 44°58'30"     |
| 14            | 30                | 124°37'52"     | 44°57'3"      |
| 15            | 30                | 124°37'52"     | 44°57'3"      |
| 16            | 30                | 124°37'52"     | 44°57'3"      |
| 17            | 30                | 124°37'52"     | 44°57'3"      |
| 19            | 30                | 124°38'7"      | 45°3'32"      |
| 20            | 20                | 124°42'32"     | 45°4'53"      |
| 21            | 20                | 124°42'32"     | 45°4'53"      |
| 22            | 20                | 124°39'43"     | 45°9'15"      |
| 23            | 20                | 124°39'43"     | 45°9'15"      |
| 24            | 20                | 124°38'19"     | 45°9'33"      |

**Table S2.** The grade classification criteria of geo-accumulation index and improved Nemerow index.

| Classification level          |                                           | Value                | Reference                  |
|-------------------------------|-------------------------------------------|----------------------|----------------------------|
| <b>Geo-accumulation index</b> |                                           |                      |                            |
| class 0                       | Unpolluted                                | $\leq 0$             | Guan et al. 2018           |
| class 1                       | Unpolluted to moderately polluted         | $0 < I_{geo} \leq 1$ |                            |
| class 2                       | Moderately polluted                       | $1 < I_{geo} \leq 2$ |                            |
| class 3                       | Moderately to heavily polluted            | $2 < I_{geo} \leq 3$ |                            |
| class 4                       | Heavily polluted                          | $3 < I_{geo} \leq 4$ |                            |
| class 5                       | Heavily to extremely polluted             | $4 < I_{geo} \leq 5$ |                            |
| class 6                       | Extremely polluted                        | $I_{geo} > 5$        |                            |
| <b>Enrichment factor</b>      |                                           |                      |                            |
| class 1                       | Minimal enrichment                        | $EF < 2$             | Huang et al. 2021          |
| class 2                       | Moderate enrichment                       | $2 \leq EF < 5$      |                            |
| class 3                       | Significant enrichment                    | $5 \leq EF < 20$     |                            |
| class 4                       | Very high enrichment                      | $20 \leq EF < 40$    |                            |
| class 5                       | Extremely high enrichment                 | $EF \geq 40$         |                            |
| <b>Improved Nemerow index</b> |                                           |                      |                            |
| class 0                       | Uncontaminated                            | $INI < 0.5$          | Santos-Francés et al. 2017 |
| class 1                       | Uncontaminated to moderately contaminated | $0.5 \leq INI < 1$   |                            |
| class 2                       | Moderately contaminated                   | $1 \leq INI < 2$     |                            |
| class 3                       | Moderately to heavily contaminated        | $2 \leq INI < 3$     |                            |

|         |                                   |                         |
|---------|-----------------------------------|-------------------------|
| class 4 | Heavily contaminated              | $3 \leq \text{INI} < 4$ |
| class 5 | Heavily to extremely contaminated | $4 \leq \text{INI} < 5$ |
| class 6 | Extremely contaminated            | $\text{INI} \geq 5$     |

**Table S3.** The evaluation criteria of the potential ecological risk index and risk assessment code.

| Classification level                                 | Value                  | Reference         |
|------------------------------------------------------|------------------------|-------------------|
| The ecological risk index of individual heavy metals |                        |                   |
| Low risk                                             | $E_r^i < 40$           | Zhang et al. 2017 |
| Moderate risk                                        | $40 \leq E_r^i < 80$   |                   |
| Considerable risk                                    | $80 \leq E_r^i < 160$  |                   |
| High risk                                            | $160 \leq E_r^i < 320$ |                   |
| Extremely high risk                                  | $E_r^i \geq 320$       |                   |
| The potential ecological risk index                  |                        |                   |
| Low risk                                             | $RI < 150$             | Zhang et al. 2017 |
| Moderate risk                                        | $150 \leq RI < 300$    |                   |
| Considerable risk                                    | $300 \leq RI < 600$    |                   |
| High risk                                            | $600 \leq RI < 1200$   |                   |
| Extremely high risk                                  | $RI \geq 1200$         |                   |
| The risk assessment code                             |                        |                   |
| No risk                                              | $RAC \leq 1$           | Zhang et al. 2017 |
| Light risk                                           | $1 < RAC \leq 10$      |                   |
| Medium risk                                          | $10 < RAC \leq 30$     |                   |
| High risk                                            | $30 < RAC \leq 50$     |                   |
| Very high risk                                       | $50 > RAC$             |                   |

**Table S4.** The meanings and values of the parameters in the human health risk assessment.

| Parameters   | Description                                    | Units               | Values                                                               |        | Reference                              |
|--------------|------------------------------------------------|---------------------|----------------------------------------------------------------------|--------|----------------------------------------|
|              |                                                |                     | children                                                             | adults |                                        |
| $R_{ingest}$ | ingestion rate of soil                         | mg/day              | 200                                                                  | 100    | USEPA 2011                             |
| $EF$         | exposure frequency                             | day/year            | 350                                                                  | 350    | Jiang et al. 2020                      |
| $ED$         | exposure duration                              | year                | 6                                                                    | 26     | Jiang et al. 2020                      |
| $BW$         | average body weight                            | kg                  | 29.3                                                                 | 62.57  | Huang et al. 2020                      |
| $AT$         | average time of exposure to contaminated soils | day                 | $365 \times ED$ (non-carcinogenic)<br>$365 \times 70$ (carcinogenic) |        | Huang et al. 2021<br>Huang et al. 2021 |
| $SA$         | exposed skin area                              | m <sup>2</sup>      | 0.23                                                                 | 0.57   | Jiang et al. 2020                      |
| $SL$         | skin adherence factor                          | mg/cm <sup>2</sup>  | 0.2                                                                  | 0.07   | USEPA 2011                             |
| $ABF$        | dermal adsorption factor                       | unitless            | 0.001                                                                |        | Jiang et al. 2020                      |
| $R_{inhal}$  | Inhalation rate                                | m <sup>3</sup> /day | 7.5                                                                  | 16.1   | MEPPRC 2014                            |
| $PEF$        | particle emission factor                       | m <sup>3</sup> /kg  | $1.36 \times 10^9$                                                   |        | USEPA 2011                             |

**Table S5.** Corresponding reference dose (*RfD*) and slope factors (*SF*) values of metals by different exposure pathways used in the human health risk assessment.

| Element | <i>RfD</i> (mg/(kgd)) |            |                | <i>SF</i> ((mgd)/mg) |            |                |
|---------|-----------------------|------------|----------------|----------------------|------------|----------------|
|         | ingestion             | inhalation | dermal contact | ingestion            | inhalation | dermal contact |
| V       | 7.00E-03              |            | 7.00E-05       |                      |            |                |
| Cr      | 3.00E-03              | 2.86E-05   | 6.00E-05       | 5.00E-01             | 4.20E+01   | 2.00E+01       |
| Co      | 2.00E-02              | 5.71E-06   | 1.60E-02       |                      | 9.80E+00   |                |
| Cu      | 4.00E-02              | 4.02E-02   | 1.20E-02       |                      |            |                |
| Zn      | 3.00E-01              | 3.00E-01   | 6.00E-02       |                      |            |                |
| Cd      | 1.00E-03              | 1.00E-05   | 1.00E-05       | 5.10E-01             | 6.30E+00   | 2.00E+01       |
| Pb      | 3.50E-03              | 3.50E-03   | 5.25E-04       | 8.50E-03             |            |                |
| Hg      | 3.00E-04              | 8.57E-05   | 2.10E-05       |                      |            |                |
| As      | 3.00E-04              | 1.23E-04   | 1.23E-04       | 1.50E+00             | 1.51E+01   | 3.66E+00       |

Reference: Huang et al. 2021; Xiao et al. 2019; Huang et al. 2020.

**Table S6.** The classification of human health risk levels.

| Classification level                         | Value                                     | Reference         |
|----------------------------------------------|-------------------------------------------|-------------------|
| <b>The non-carcinogenic risk</b>             |                                           |                   |
| There is potential adverse health effect     | HQ or HI >1                               | Huang et al. 2021 |
| There is not potential adverse health effect | HQ or HI ≤1                               |                   |
| <b>The carcinogenic risk</b>                 |                                           |                   |
| Negligible cancer risk                       | TCR < 10 <sup>-6</sup>                    | Huang et al. 2021 |
| Acceptable cancer risk                       | 10 <sup>-6</sup> ≤ TCR < 10 <sup>-4</sup> |                   |
| Significant cancer risk                      | 10 <sup>-4</sup> ≤ TCR                    |                   |

**Table S7.** Class distribution for pollution assessment of heavy metals by Pollution load index (PLI).

| Pollution degree    | No pollution | pollution |
|---------------------|--------------|-----------|
| PLI <sub>n</sub>    | 0            | 100%      |
| PLI <sub>zone</sub> |              | 100%      |

**Table S8.** Class distribution for pollution assessment of heavy metals by Nemerow index (P<sub>N</sub>).

| Pollution degree | safe | precaution | slightly polluted | moderately polluted | seriously polluted |
|------------------|------|------------|-------------------|---------------------|--------------------|
| P <sub>N</sub>   | 0    | 0          | 0                 | 0                   | 100%               |

**Table S9.** Class distribution for pollution assessment of heavy metals by improved Nemerow index (INI).

| Classification level                      | Class distribution |
|-------------------------------------------|--------------------|
| <b>Improved Nemerow index</b>             |                    |
| The mean value of INI                     | 1.55               |
| Uncontaminated to moderately contaminated | 5.71%              |
| Moderately contaminated                   | 91.43%             |
| Moderately to heavily contaminated        | 2.86%              |

**Table S10.** Class distribution for pollution assessment of heavy metals by potential ecological risk index (RI).

| Classification level                       | Class distribution |
|--------------------------------------------|--------------------|
| <b>The potential ecological risk index</b> |                    |
| The mean value of RI                       | 408.28             |
| Moderate risk                              | 22.86%             |
| Considerable risk                          | 74.28%             |
| High risk                                  | 2.86%              |

**Table S11.** Rotated component matrix for heavy metals in soil.

| Heavy metal                           | PC1         | PC2         | PC3         | PC4         |
|---------------------------------------|-------------|-------------|-------------|-------------|
| V                                     | <b>0.77</b> | 0.42        | 0.27        | 0.02        |
| Cr                                    | <b>0.91</b> | 0.18        | -0.08       | 0.00        |
| Co                                    | 0.68        | 0.45        | 0.49        | 0.13        |
| Cu                                    | 0.54        | <b>0.76</b> | 0.09        | 0.02        |
| Zn                                    | <b>0.80</b> | 0.38        | 0.40        | 0.09        |
| Cd                                    | 0.04        | 0.09        | 0.04        | <b>0.99</b> |
| Pb                                    | 0.50        | 0.63        | 0.47        | -0.02       |
| Hg                                    | 0.10        | 0.16        | <b>0.96</b> | 0.04        |
| As                                    | 0.22        | <b>0.87</b> | 0.17        | 0.15        |
| Percentage of variance (%)            | 34.63       | 25.67       | 18.52       | 11.45       |
| Percentage of cumulative variance (%) | 34.63       | 60.30       | 78.82       | 90.27       |

note: PC1, 2, 3 and 4 refer to principal component 1, 2, 3 and 4.

**Table S12.** List of Abbreviations.

| Abbreviation        | Definition                                                                                         | Unit  |
|---------------------|----------------------------------------------------------------------------------------------------|-------|
| HMs                 | heavy metals                                                                                       | mg/kg |
| CF                  | contamination factor                                                                               | -     |
| I <sub>geo</sub>    | geo-accumulation index                                                                             | -     |
| EF                  | enrichment factor                                                                                  | -     |
| PLI                 | pollution load index                                                                               | -     |
| PN                  | Nemerow pollution index                                                                            | -     |
| INI                 | improved Nemerow index                                                                             | -     |
| RAC                 | risk assessment code                                                                               | %     |
| RI                  | potential ecological risk index                                                                    | -     |
| HHRA                | human health risk assessment                                                                       | -     |
| CR                  | carcinogenic risk                                                                                  | -     |
| NCR                 | non-carcinogenic risk                                                                              | -     |
| HI                  | hazard index                                                                                       | -     |
| HQ                  | hazard quotient                                                                                    | -     |
| TCR                 | total carcinogenic risk                                                                            | -     |
| SD                  | standard deviation                                                                                 | -     |
| CV                  | coefficient of variation                                                                           | -     |
| BV                  | background values                                                                                  | mg/kg |
| RSV                 | the screening value of agricultural land                                                           | mg/kg |
| N <sub>exceed</sub> | the rate of the number for soil samples exceeding the background value to the total samples number | %     |
